# Supplementary material
Source: PubMed Central journal article supplement (PMC6342703)
Supplement: mmc2.pdf [file mmc2.pdf]

# Convection-Induced Biased Distribution of Actin Probes in Live Cells

Sawako Yamashiro,<sup>1,2,\*</sup> Daisuke Taniguchi,<sup>2</sup> Soichiro Tanaka,<sup>3</sup> Tai Kiuchi,<sup>2</sup> Dimitrios Vavylonis,<sup>4</sup> and Naoki Watanabe<sup>1,2,\*</sup>

<sup>1</sup>Laboratory of Single-Molecule Cell Biology and <sup>2</sup>Department of Pharmacology, Kyoto University Graduate School of Medicine, Kyoto Japan;

<sup>3</sup>Laboratory of Single-Molecule Cell Biology, Tohoku University Graduate School of Life Sciences, Sendai, Miyagi, Japan; and <sup>4</sup>Department of Physics, Lehigh University, Bethlehem, Pennsylvania

**ABSTRACT** Fluorescent markers that bind endogenous target proteins are frequently employed for quantitative live-cell imaging. To visualize the actin cytoskeleton in live cells, several actin-binding probes have been widely used. Among them, Lifeact is the most popular probe with ideal properties, including fast exchangeable binding kinetics. Because of its fast kinetics, Lifeact is generally believed to distribute evenly throughout cellular actin structures. In this study, however, we demonstrate misdistribution of Lifeact toward the rear of lamellipodia where actin filaments continuously move inward along the retrograde flow. Similarly, phalloidin showed biased misdistribution toward the rear of lamellipodia in live cells. We show evidence of convection-induced misdistribution of actin probes by both experimental data and physical models. Our findings warn about the potential error arising from the use of target-binding probes in quantitative live imaging.

## INTRODUCTION

Quantitative live-cell imaging is becoming increasingly important in the field of biology. Apart from protein probes covalently attached to fluorescent proteins or chemicals, fluorescent reporters that bind endogenous target proteins are frequently employed for quantitative live-cell imaging (1–3). For proper quantification of target-molecule distribution, two criteria are generally considered to be necessary and sufficient: 1) the fluorescent probe can bind and report all species of targets equally, and 2) it does not perturb dynamics of endogenous targets *in vivo*.

To visualize the actin cytoskeleton in live cells, fluorescently labeled actin probes including Lifeact, phalloidin, and actin-binding domains from various proteins have been widely used (4). Among them, Lifeact (5) is the most popular probe with ideal properties including fast exchangeable binding kinetics (6). Because of its fast kinetics, Lifeact is generally believed to distribute evenly throughout cellular actin structures. In this study, we demonstrate misdistribution of Lifeact toward the rear of lamellipodia where actin filaments continuously move inward

along the retrograde actin flow that is widely observed in adherent cells (7–9). Similarly, phalloidin, which has been employed as a marker of F-actin in quantitative live-cell imaging (10–12), showed biased misdistribution toward the rear of lamellipodia in live cells. We show evidence of convection-induced misdistribution of actin probes by both experimental data and physical models. Our data and simulations indicated that the different  $K_d$  of the actin probe and retrograde actin flow speeds may give rise to a wide variety of distribution patterns.

## MATERIALS AND METHODS

### Plasmids

The expression vectors harboring the defective CMV (cytomegalovirus) promoter (delCMV) for Lifeact-mCherry, Lifeact-EGFP, and EGFP-actin were described (13–15). miRFP703 cDNA (16) was obtained from Addgene (Cambridge, MA). The expression vector for miRFP703-actin was generated by substituting miRFP703 cDNA for the coding sequence of EGFP in delCMV-EGFP-actin.

### Cell culture, transfection and electroporation

*Xenopus laevis* XTC cells were maintained as described previously (13,17). The expression constructs were transfected into XTC cells by using polyethyleneimine as described previously (17). Alexa Fluor 546 phalloidin (Thermo Fisher Scientific, Waltham, MA) (1  $\mu$ M) was electroporated into XTC cells with the Neon transfection system (Invitrogen, Carlsbad, CA)

Submitted July 23, 2018, and accepted for publication November 16, 2018.

\*Correspondence: [yamashiro.sawako.5c@kyoto-u.ac.jp](mailto:yamashiro.sawako.5c@kyoto-u.ac.jp) or [watanabe.naoki.4v@kyoto-u.ac.jp](mailto:watanabe.naoki.4v@kyoto-u.ac.jp)

Sawako Yamashiro and Daisuke Taniguchi contributed equally to this work.

Editor: Kinneret Keren.

<https://doi.org/10.1016/j.bpj.2018.11.022>

© 2018 Biophysical Society.

as described previously (15). Keratocytes were isolated from scales of goldfish (*Carassius auratus*) by culturing between a culture dish and a coverslip, using L-15 Leibovitz medium (Invitrogen) supplemented with 10% fetal bovine serum (Nichirei Biosciences, Tokyo, Japan) and 1% Antibiotic-Antimycotic Mixed Stock Solution (Nacalai Tesque, Kyoto, Japan). Then cells were trypsinized, resuspended with the culture medium, collected by centrifugation, and subjected to electroporation to simultaneously deliver Alexa Fluor 546 phalloidin (0.25  $\mu\text{M}$ ) and CF680R-actin (18) as described (15).

## Fluorescence microscopy and data analysis

Live-cell imaging was carried out using XTC cells as previously described (17,19). Briefly, XTC cells were allowed to spread on a poly-L-lysine-coated coverslip in 70% L-15 Leibovitz medium without serum. Keratocytes were allowed to spread on a coverslip in L-15 Leibovitz medium supplemented with 10% fetal bovine serum. Time-lapse imaging of XTC cells and keratocytes was acquired by using a microscope (IX71; Olympus, Tokyo, Japan) equipped with 100-W mercury illumination, a PlanApo 1.40 numerical aperture (NA) 100 $\times$  oil objective (Olympus), and an electron multiplying charged coupled device (EMCCD) camera (iXon3; Andor Technology, Belfast, Northern Ireland) or a microscope (IX83; Olympus) equipped with a PlanApo 1.40 NA 100 $\times$  oil objective and an EMCCD camera (Evolve 512; Photometrics, Tucson, AZ).

Immediately after time-lapse imaging, XTC cells and keratocytes were fixed with cytoskeleton buffer (10 mM 2-(*N*-morpholino)ethane sulfonic acid (pH 6.1), 90 mM KCl, 3 mM  $\text{MgCl}_2$ , 2 mM EGTA) containing 3.7% paraformaldehyde for 15 min and permeabilized with 0.1% Triton X-100 in cytoskeleton buffer for 10 min at room temperature. Alexa 647 phalloidin (Thermo Fisher Scientific), Alexa 546 phalloidin (Thermo Fisher Scientific), or Oregon Green 488 phalloidin (Invitrogen) was used for staining F-actin in XTC cells and keratocytes.

For Lifeact staining in fixed XTC cells, the Lifeact peptide (MGVADLIKKFESISKEE) was synthesized by Sigma-Aldrich (St. Louis, MO), and then the synthesized Lifeact peptide conjugated with an N-terminal Atto 550 fluorophore (Sigma-Aldrich) was used. After the fixation and permeabilization processes described above, the cells were incubated with 1 nM Atto-550 Lifeact in an imaging solution comprising HEPES-buffered solution (10 mM HEPES (pH 7.2), 90 mM KCl, 3 mM  $\text{MgCl}_2$ , 100  $\mu\text{M}$  dithiothreitol [DTT]) with an oxygen-scavenging mix (200  $\mu\text{g}/\text{mL}$  glucose oxidase, 35  $\mu\text{g}/\text{mL}$  catalase, 4.5  $\text{mg}/\text{mL}$  glucose, 0.5% 2-mercaptethanol) as described previously (6). Images of Atto-550 Lifeact were acquired using an epifluorescent microscope (IX83) equipped with a PlanApo 1.40 NA 100 $\times$  oil objective and an EMCCD camera (Evolve 512). Lifeact staining images were generated by integrating images of Atto-550 Lifeact for 150 s (3000 frames). After imaging of Atto-550 Lifeact, the probe was washed out 10 times with the HEPES-buffered solution, and then the cells were stained with rhodamine-phalloidin (Thermo Fisher Scientific).

To measure the retrograde flow speed in cells containing actin probes at a low level, we tracked actin speckles or phalloidin speckles in lamellipodia in a series of time-lapse images as previously described (14,15). In cells that expressed actin probes at high level, we used kymograph analysis with EGFP-actin to measure the retrograde flow speed.

Fluorescence intensity was measured using the Linescan function in the MetaMorph software (Molecular Devices, San Jose, CA). The background intensity in an area outside of the cell was subtracted from the original image before the measurement. In each cell image, 7–11 lines were placed across the lamellipodium by avoiding condensed F-actin structures. The average fluorescence intensity was shown as a function of distance from the lamellipodium tip for each cell.

## Fluorescence anisotropy measurement

The synthesized Lifeact peptide conjugated with an N-terminal Atto 488 fluorophore (Sigma-Aldrich) was used. Rabbit skeletal muscle actin was

prepared from acetone powder by one cycle of polymerization and pelleting as described previously (20). Actin was depolymerized in G-buffer (2 mM Tris, 0.2 mM  $\text{CaCl}_2$ , 0.2 mM ATP, 1 mM DTT (pH 8.0)) and then further purified by gel filtration with HiLoad16/60 Superdex 200 (GE Healthcare, Little Chalfont, UK). Cytoplasmic human platelet actin was obtained from Cytoskeleton (Denver, CO). To prepare F-actin, G-actin in G-buffer was polymerized into F-actin by addition of 0.1 volume of 10 $\times$  polymerizing buffer (200 mM Hepes, 1 M KCl, 20 mM  $\text{MgCl}_2$ , 2 mM DTT, 5 mM ATP, 10 mM EGTA (pH 7.5)) and incubated overnight on ice.

Fluorescence anisotropy measurements were performed using an EnVision plate reader (Perkin Elmer, Waltham, MA) with a polarization filter set (fluorescein isothiocyanate FP label; excitation wavelength 480 nm, emission wavelength 535 nm) at room temperature. Assays with G-actin and F-actin were performed in G-buffer for samples with G-actin and in F-buffer (20 mM Hepes, 0.1 M KCl, 2 mM  $\text{MgCl}_2$ , 0.2 mM DTT, 0.5 mM ATP, 1 mM EGTA (pH 7.5)) for samples with F-actin, respectively. F-actin was fragmented by sonication immediately before mixing with Atto-488-labeled Lifeact (Atto-488 Lifeact). Atto-488 Lifeact (0.1  $\mu\text{M}$ ) was mixed with increasing concentrations of G-actin or F-actin in a total volume of 150  $\mu\text{L}$ , and the mixtures were incubated for 15 min at room temperature. Then the horizontal ( $I_h$ ) and vertical ( $I_v$ ) components of the fluorescent intensity were measured. The fluorescence anisotropy,  $r$ , is calculated using  $r = (I_v - GI_h)/(I_v + 2GI_h)$ . The  $G$  factor is determined with fluorescein in accordance with the instruction of the manufacturer.

## Modeling the distribution of F-actin-binding probe in lamellipodia

In this study, we first considered a model lamellipodium of a single cell moving at a constant speed  $V$  ( $>0$ ) toward the lab frame  $+X$  direction. We assumed that the lamellipodium is homogeneous in the  $Y$ -direction and the thickness of the lamellipodium in the  $Z$ -direction is very thin (100–200 nm). Thus, the model lamellipodium is effectively along one dimension,  $X$ , describing a cross section through the lamellipodium with length  $L$ . In the cell frame  $x = X - Vt$  ( $0 \leq x \leq L$ ), where  $x = 0$  represents the lamellipodial base and  $x = L$  indicates the lamellipodial tip, we define  $C_b(x, t)$  and  $C_f(x, t)$  as the concentrations of F-actin-bound and free actin probe in the lamellipodium at time  $t$ . Free actin probes can either bind to F-actin with a rate of  $k_{on}$  or diffuse in the cytosol with a diffusion coefficient  $D$ . Bound actin probes can unbind from F-actin with a rate of  $k_{off}$  or be advected by the actin retrograde flow at a velocity  $v$  measured on the cell frame. In this study, we considered two types of F-actin concentration profiles: 1) a uniform distribution  $F = \bar{F}$  (constant) (21,22) and 2) a linear profile that decreases toward the lamellipodial base,  $F = ax + b$  (Fig. 1 C). The spatiotemporal dynamics of  $C_b$  and  $C_f$  in the cell frame  $x$  can be described by the following set of reaction-convection-diffusion equations:

$$\frac{\partial C_b}{\partial t} = v \frac{\partial C_b}{\partial x} - k_{off} C_b + k_{on} F C_f \quad (1)$$

and

$$\frac{\partial C_f}{\partial t} = D \frac{\partial^2 C_f}{\partial x^2} + k_{off} C_b - k_{on} F C_f. \quad (2)$$

To solve Eqs. 1 and 2, the following boundary conditions and conservation law were assigned:

$$v C_b(L, t) = 0, \quad (3)$$

$$D \frac{\partial C_f(x, t)}{\partial x} \Big|_{x=L} = 0, \quad (4)$$

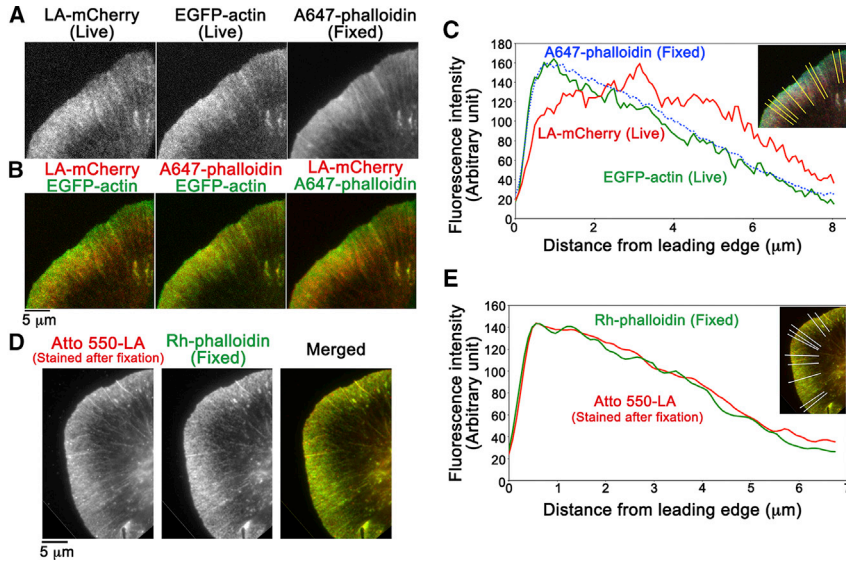

**FIGURE 1** (A) Images of Lifeact-mCherry (LA-mCherry, *left*) and EGFP-actin (*middle*) in live *Xenopus* XTC cells. After fixation, F-actin was stained with Alexa 647 phalloidin (A647-phalloidin, *right*). Representative data are shown ( $n = 6$  cells). (B) Merged images of (A) showing rear-biased distribution of LA-mCherry in lamellipodia are given. (C) The average fluorescence intensity of the images in (A) along the yellow lines in the inset is shown. (D and E) Similar distribution of Atto-550 Lifeact (Atto-550-LA) and rhodamine-phalloidin (Rh-phalloidin) in fixed XTC cells is shown. Staining with Rh-phalloidin was carried out after washing out Atto-550 Lifeact, which is an exchangeable probe (6). Representative data are shown ( $n = 3$  cells, see Fig. S1).

and

$$\int_0^L [C_b(x, t) + C_f(x, t)] dx = \text{constant}. \quad (5)$$

The boundary conditions Eqs. 3 and 4 represent no-flux conditions for bound and free probes at the lamellipodial tip, whereas Eq. 5 indicates the conservation law that the total amount of actin probe in the lamellipodia remains constant.

Equations 1 and 2 were discretized using the second-order finite difference scheme in space (step  $dx = 0.02 \mu\text{m}$ ) and integrated in time (step  $dt = 5 \mu\text{s}$ ) by the second-order Runge-Kutta method until they reached the steady-state solution. The initial conditions were set as  $C_b(x, 0) = 0$  and  $C_f(x, 0) \in \mathcal{U}(0, 1)$ , where  $\mathcal{U}(0, 1)$  represents a uniform random variable ranging from 0 to 1.

### Steady-state probe distribution at the uniform F-actin profile

In the case of a uniform F-actin profile  $F = \bar{F}$  (constant), the steady-state solution of Eqs. 1 and 2 can be analytically obtained as

$$C_b(x) = \frac{k_{on}\bar{F}}{k_{off}}C_1 + \frac{D}{v}(C_2\xi_2e^{-\xi_2x} + C_3\xi_3e^{-\xi_3x}) \quad (6)$$

and

$$C_f(x) = C_1 + C_2e^{-\xi_2x} + C_3e^{-\xi_3x}, \quad (7)$$

where

$$\xi_2 = \frac{-1 + \sqrt{1 + \frac{4k_{on}\bar{F}}{D}\left(\frac{v}{k_{off}}\right)^2}}{\frac{2v}{k_{off}}} (>0), \quad (8)$$

$$\xi_3 = \frac{-1 - \sqrt{1 + \frac{4k_{on}\bar{F}}{D}\left(\frac{v}{k_{off}}\right)^2}}{\frac{2v}{k_{off}}} (<0), \quad (9)$$

$$C_1 = 0, \quad (10)$$

$$C_2 = \frac{C^*}{1 - \frac{\xi_2}{\xi_3}e^{-(\xi_2 - \xi_3)L}}, \quad (11)$$

and

$$C_3 = \frac{C^*}{1 - \frac{\xi_3}{\xi_2}e^{-(\xi_3 - \xi_2)L}}. \quad (12)$$

Here, the constant  $C^*$  takes an arbitrary value depending on the total amount of probe in lamellipodia. The fact that  $\xi_2 > 0$  means that the dominant term describing the exponential increase of probe concentration toward the lamellipodial base is given by the terms proportional to  $e^{-\xi_2x}$  in Eqs. 6 and 7. The exponential profiles of both free and bound probes greatly differ from the uniform F-actin profile, suggesting that probe distribution no longer reflects the true F-actin distribution.

### Values of the model parameters

The model parameters used in this study are summarized in Table S1. The retrograde flow speed  $v$  and lamellipodial length  $L$  were measured by our experimental data. The diffusion coefficient  $D$  of free probe was estimated from that of G-actin in lamellipodia ( $\sim 6 \mu\text{m}^2 \text{s}^{-1}$ ) (23) by using the fact that the diffusion coefficient scales approximately as the inverse of the cube root of the molecular weight ( $\sim 29.3$  kDa for Lifeact-mCherry and 1.95 kDa for Alexa 647 phalloidin). We calculated the value of the dissociation rate  $k_{off}$  of Lifeact-mCherry by dividing  $\ln 2$  by the half-life of Lifeact-mCherry (23 ms) (6). Because the in vitro value of  $k_{off}$ ,  $2.6 \times 10^{-4} \text{s}^{-1}$ , of phalloidin (24) is much smaller than the inverse of the half-life of actin filaments, the dissociation rate of Alexa 647 phalloidin was estimated by the inverse of averaged halftime of lamellipodial actin filaments ( $0.08 \text{s}^{-1}$ ). As for the probe association rate  $k_{on}$ , we used the value of  $2.9 \times 10^{-2} \mu\text{M}^{-1} \text{s}^{-1}$  for Alexa 647 phalloidin reported in the previous in vitro study (24), whereas we used  $2.28 \mu\text{M}^{-1} \text{s}^{-1}$  for Lifeact-mCherry based on the relation  $k_{on} = k_{off}/K_d$ , where  $K_d$  is the equilibrium dissociation constant ( $13.2 \mu\text{M}$  for Lifeact-mCherry) (25). The value of uniform F-actin concentration  $\bar{F}$  was set as  $1000 \mu\text{M}$  according to the work by Abraham (26). For the case of the linear F-actin profile, the concentration was estimated by using the fluorescence

intensity of Alexa647-phalloidin in a fixed cell in our experiment (Fig. 1 C), assuming that the F-actin concentration at the tip of lamellipodia is  $1000 \mu\text{M}$ .

## RESULTS

### Rear-biased misdistribution of Lifeact and phalloidin in lamellipodia

We first noticed that Lifeact (5) shows rear-biased misdistribution in lamellipodia. We compared distributions of Lifeact and EGFP-actin in lamellipodia of live cells (Fig. 1, A–C), which were then compared to F-actin distribution stained with phalloidin after fixation. Thin lamellipodia contain a dense F-actin meshwork (26). The measured F/G-actin ratio is 6:1 with extraction experiments (13) and 12:1~20:1 with fluorescent decay after photoactivation (27). Owing to the high F/G-actin ratio in lamellipodia, EGFP-actin showed approximately identical distribution to F-actin (Fig. 1 B, middle). The fluorescence intensities of EGFP-actin and phalloidin were high near the leading edge, with a gradual decrease toward the base of lamellipodia (Fig. 1 C). In marked contrast, Lifeact reached its maximal intensity 2–5  $\mu\text{m}$  away from the leading edge (Fig. 1, B and C). Importantly, when fixed cells were stained with Lifeact, F-actin distribution was identical to that stained with Lifeact (Fig. 1, D and E; Fig. S1), indicating that the rear-biased distribution of Lifeact (Fig. 1 C, also see Fig. 6) occurs specifically in live cells.

We also found the rear-biased misdistribution of phalloidin by comparing distributions of phalloidin and fluorescently labeled actin (15,18) in lamellipodia of live fish keratocytes (Fig. 2, A and B; Fig. S2). In live keratocytes, phalloidin was scarcely distributed near the leading edge and gradually increased toward the base of lamellipodia (Fig. 2 A, left, and Fig. 2 B, red line). By contrast, fluorescent dye-labeled actin in live cells (Fig. 2 A, middle, and Fig. 2 B, green line) and F-actin stained with phalloidin after fixation (Fig. 2 A, right, and Fig. 2 B, blue dotted line) distributed almost uniformly in lamellipodia, which was compatible with F-actin distributions in the previous histochemical and electron microscopic studies (21,22). Similar rear-biased distribution of phalloidin in live cells was found in the previous studies (10–12,28). Of note, Valotton et al. (11) reported a remarkable discrepancy of phalloidin distribution between live-cell and fixed-cell situations by direct

comparison in the same cell (11). These observations reveal the apparent misdistribution of both Lifeact and phalloidin toward the base of lamellipodia in living cells.

### Mathematical simulations of convection-induced biased distribution of actin probes

We hypothesized a convection-induced biased distribution mechanism (Fig. 3 A) for the rear-biased misdistribution of actin probes. In lamellipodia, the dense F-actin ( $\sim 1000 \mu\text{M}$ ) (26) network is constantly conveyed to the cell center by the retrograde actin flow.

Lifeact has been reported to have a 10- to 30-fold higher affinity for binding to G-actin than to F-actin in vitro (5). We reevaluated the affinities of Lifeact for G- and F-actin by fluorescence anisotropy assay in vitro using Atto-488-labeled Lifeact (Atto 488-Lifeact). F-actin increased fluorescence anisotropy of Atto-488 Lifeact in a concentration-dependent manner (Fig. 3 B). We performed the assays with G-actin in a low-salt condition to prevent actin polymerization. Under the condition, neither muscle nor cytoplasmic G-actin caused an increase in fluorescence anisotropy of Atto-488 Lifeact (Fig. 3 B). We concluded that Lifeact probes shuttle between the F-actin bound state and the free state when introduced in live cells and built a physical model based on this promise.

The association of free Lifeact and phalloidin to F-actin is estimated to occur on the orders of  $1 \times 10^{-4}$  and  $1 \times 10^{-2}$  s, respectively. Thus, rapid reassociation to F-actin might prevent free probes from diffusing back to the front (Fig. 3 A). The convection-induced biased distribution hypothesis requires rigorous testing, especially for the fast exchangeable Lifeact probe (with off rate  $30 \text{ s}^{-1}$ ) (6) because Lifeact travels only  $\sim 1 \text{ nm}$  on average per binding event, and diffusion, which depends on the square root of time, may mobilize free probes effectively in a short time. To test this, we developed a physical model to calculate the distributions of Lifeact and phalloidin in lamellipodia. In the model, the dynamics of actin probes in lamellipodia at the position  $x$  (cell frame) and time  $t$  depends on transport by actin retrograde flow, diffusion in the cytosol, and binding kinetics:

$$\frac{\partial C_b}{\partial t} = v \frac{\partial C_b}{\partial x} - k_{\text{off}} C_b + k_{\text{on}} F C_f \quad (13)$$

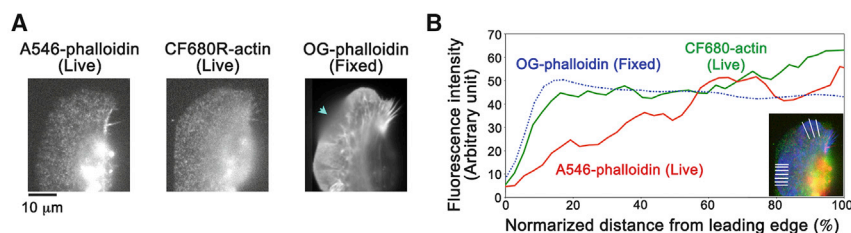

FIGURE 2 (A) Fluorescent speckle images of Alexa 546 phalloidin (A546-phalloidin, left) and CF680R-actin (middle) in a live fish keratocyte. The probes were delivered into keratocytes by electroporation (15). F-actin was stained with Oregon Green phalloidin (OG-phalloidin) after fixation (right). (B) The average fluorescence intensity of the images in (A) along the white lines in the inset is shown. Representative data are shown ( $n = 4$  cells). The region where the lamellipodium detached from the glass was excluded from analysis (the blue arrow in (A)).

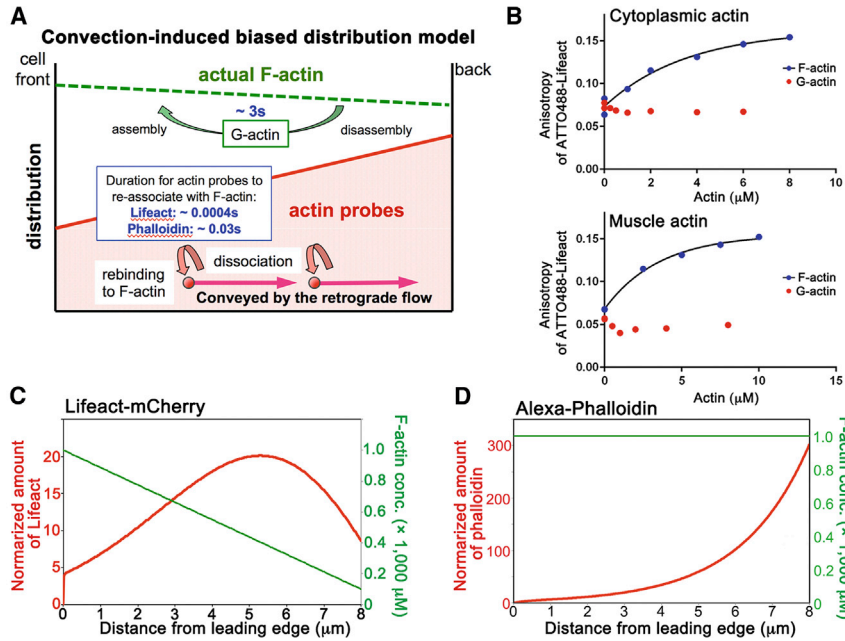

**FIGURE 3** (A) Convection-induced biased distribution model. Because of fast reassociation and the retrograde actin flow, the probes are biased toward back of lamellipodia. (B) Measurement of Atto-488 Lifect binding to cytoplasmic (upper) or muscle (lower) G-actin (blue dots) and F-actin (red dots) by fluorescence anisotropy is shown. Atto-488 Lifect binds to F-actin with the lines showing the best fit to  $K_d = 3.4 \mu\text{M}$  for cytoplasmic actin and  $K_d = 2.3 \mu\text{M}$  for muscle actin. (C) Calculated distribution of LA-mCherry (red) in a model lamellipodium with a linear decrease in F-actin concentration (green) is shown. (D) Calculated distribution of Alexa phalloidin (red) in a model lamellipodium with a uniform F-actin distribution (green) is shown.

and

$$\frac{\partial C_f}{\partial t} = D \frac{\partial^2 C_f}{\partial x^2} + k_{off} C_b - k_{on} F C_f, \quad (14)$$

where  $C_f$ ,  $C_b$ , and  $F$ , respectively, represent concentrations of free, bound actin probes, and F-actin in lamellipodia.  $v$  indicates retrograde flow velocity,  $D$  represents the diffusion coefficient of free actin probes, and  $k_{on}$  and  $k_{off}$  are association and dissociation rates, respectively (see [Materials and Methods](#) for details of the model). We examined the concentration profile of actin-binding probes in the model lamellipodia at the steady state. Our model produced the concentration profile of total Lifect ( $C_f + C_b$ ) as a rear-biased gentle peak (Fig. 3 C), which is similar to our experimental observations (Fig. 1 C). For phalloidin in the lamellipodia of keratocytes, our model predicted an exponential increase of the total phalloidin concentration toward the lamellipodial base (Fig. 3 D), which is also similar to our experimental results (Fig. 2 B).

Several studies suggest the existence of actin oligomers in addition to G- and F-actin in lamellipodia (29–31). We previously reported that a simulation including actin oligomers provides a good agreement between single-molecule speckle microscopy and FRAP (fluorescence recovery after photobleaching) experiments with EGFP-actin in lamellipodia (29). We also examined the effects of the existence of actin oligomers on the convection-induced distribution of Lifect using the values we estimated in our previous study (29). The calculated profile of total Lifect showed that the rear-biased misdistribution of Lifect remains under the condition, including actin oligomers, whereas the existence of actin oligomers provides slight attenuation of the misdistribution (Fig. S3).

Our model showed that the different  $K_d$  of the actin probe gives rise to the rear-biased distribution patterns with various degrees of bias (Fig. 4). Even if the  $K_d$  was set to be as large as  $53 \mu\text{M}$  (Fig. 4 B, blue line), the concentration profile clearly deviates from that of F-actin. Therefore, actin probes with faster binding kinetics than fluorescent protein-tagged Lifect, which binds to F-actin with a  $K_d$  of 9–13  $\mu\text{M}$  (25), can still be mislocalized by a convection-induced biased distribution mechanism.

In addition, our physiological model enables us to predict how the retrograde flow speeds affect the convection-induced distribution patterns of the actin probes. Our model showed that the faster retrograde flow speed brings a more rear-biased effect on distributions of the actin probes (Fig. 5).

To validate these model predictions, we compared distributions of Lifect (low-affinity F-actin-binding probe) (25), phalloidin (high-affinity F-actin-binding probe), (24) and F-actin simultaneously in lamellipodia with diverse retrograde flow speeds (Fig. 6). We found that the peak of phalloidin intensity was more rear biased than those of Lifect intensity (Fig. 6, B, D, F, and H). Also see merged images of LA-EGFP and A546-phalloidin in Fig. 6, A, C, E, and G), which is consistent with our model (Fig. 5). The rear-biased misdistribution of Lifect was more marked in cells with fast retrograde flow speeds (Fig. 6, A–D) than cells with slow retrograde flow speeds (Fig. 6, E–H). These data indicate that the convection-induced misdistribution is highly sensitive to the change in the flow speed of the actin meshwork.

## DISCUSSION

In this study, we found a convection-dependent mechanism that may strongly influence the distribution of fluorescent

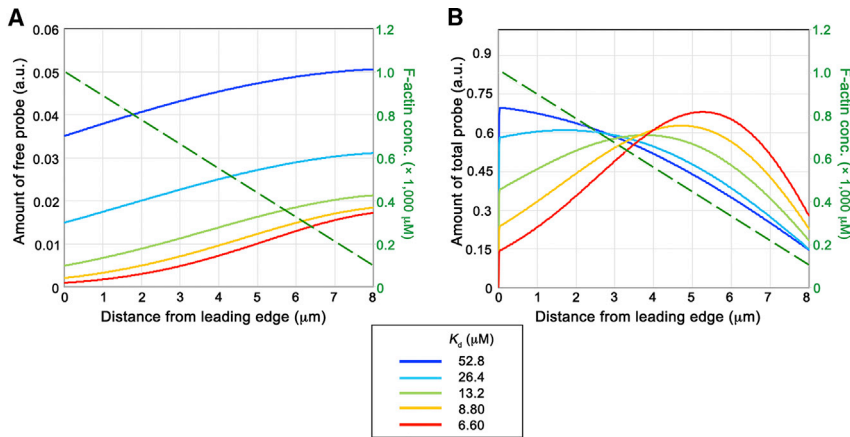

FIGURE 4 Simulated concentration profile of free (A) and total (B) actin probes with various  $K_d$ . The other parameters, except for  $k_{on}$ , are the same as those shown in Fig. 3 C and Table S1. F-actin distribution is depicted by a green dotted line. The amount of probe is measured in the same units on both panels.

markers. Interruption of F-actin binding of these actin probes by an actin-binding protein cofilin may also affect their distributions. Cofilin competes with phalloidin for binding to F-actin (32) and reduces the affinity of F-actin for Lifeact (25) *in vitro*. However, cofilin is excluded from the leading edge of keratocytes (33). In XTC cells, cofilin distributes throughout lamellipodia without showing accumulation near the leading edge (34). Therefore, interruption by cofilin cannot explain the rear-biased misdistribution of Lifeact and phalloidin in lamellipodia.

Initially, we started this study to examine whether the retrograde actin flow gives rise to the rear-biased misdistribution of phalloidin that has been used for quantitative live-cell imaging (10,12). To our surprise, we found that even Lifeact, which exhibits extremely fast exchangeable binding kinetics (5,6), showed rear-biased misdistribution under the influence of the retrograde actin flow. The convection-induced mechanism presumably influences distributions of actin-binding probes in general (35).

The previous study (36) proposes that the retrograde actin flow increments cellular polarity by convection of associate molecules. Maiuri et al. (36) demonstrated that the speed of retrograde actin flow positively correlates with the cell migration persistence time. The correlation

was attributed to the convection of polarity cues by the retrograde flow, which reinforces the asymmetric distribution of polarity cues (36). The authors examined distributions of actin-binding probes, including Lifeact, in live cells with different retrograde flow speeds. In contrast to our observations, Maiuri et al. concluded that increasing the retrograde flow speed did not change the concentration profile of Lifeact (36). Misdistribution of Lifeact might have been overlooked because the distributions of actin-binding probes were not compared to the actual F-actin distribution. In addition, the authors proposed accumulation of a polarity cue to the rear based on the theoretical model including a reaction-diffusion-convection system (36). However, F-actin distribution was not taken into account in the model. Thus, the convection-induced misdistribution of Lifeact was unrecognized in the previous study (36).

Considering that Lifeact travels only  $\sim 1$  nm on average per F-actin-binding event, the influence of the retrograde actin flow would seemingly be negligible. However, in this study, both experimental observations and physical models revealed misdistribution of Lifeact toward the rear of lamellipodia. Our observations indicate that the misdistribution of Lifeact is sensitive to the change in the flow speed of the actin meshwork. Our physical model incorporating

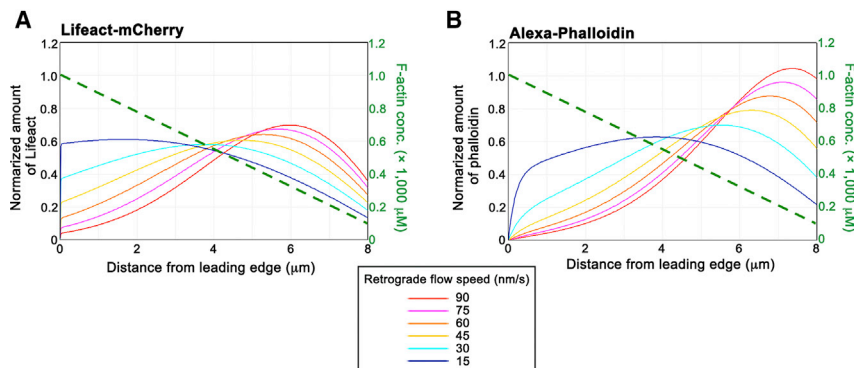

FIGURE 5 Simulated concentration profile of total LA-mCherry (A) and Alexa phalloidin (B) with various retrograde flow speeds. The other parameters, except for retrograde flow speed, are the same as those adopted in Fig. 3 C and Table S1. The linear F-actin distribution is depicted by a green dotted line.

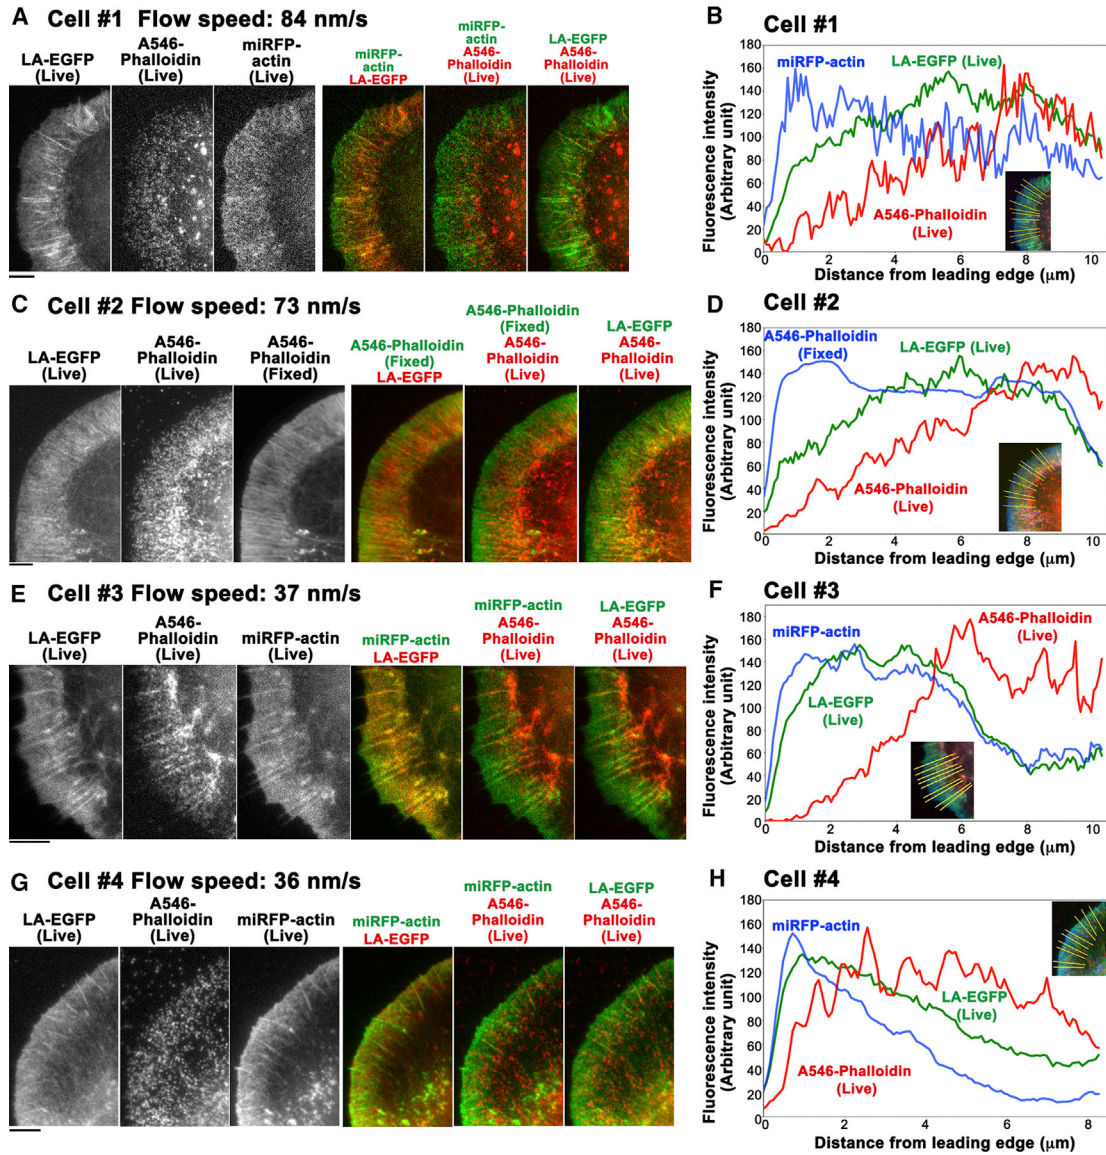

FIGURE 6 (A, C, E, and G) Images of Lifeact-EGFP (LA-EGFP) and Alexa 546 phalloidin (A546-phalloidin) in four live *Xenopus* XTC cells with the retrograde flow speeds indicated. The distributions of LA-EGFP and A546-phalloidin are compared to the F-actin distribution visualized by miRFP703-actin in live cells (A, E, and G) or staining with A546-phalloidin after fixation (C). (B, D, F, and H) The average fluorescence intensity of the images in (A, C, and E) or (G) along the yellow lines in the inset is shown. Representative data are shown (n = 11 cells). Bars, 5  $\mu$ m.

F-actin distribution and  $k_{on}$  and  $k_{off}$  values of Lifeact produced the concentration profile of Lifeact as a rear-biased peak, which is not consistent with the F-actin profile. These findings clearly indicate that the retrograde actin flow gives rise to the misdistribution of Lifeact.

Our finding also raises the intriguing possibility that the retrograde actin flow may influence distributions of actin-binding proteins to generate gradient distribution. As described above, cofilin is excluded from the leading edge of keratocytes (33), which may be partly due to the convection-dependent mechanism in lamellipodia.

Our results warn about the potential error arising from the use of target-binding probes in quantitative imaging.

Even Lifeact, which has ideal properties as an actin-binding probe, showed noticeable misdistribution under the influence of the retrograde actin flow. Several studies have employed Lifeact or phalloidin for quantitative analyses of the amounts of F-actin (14,37) and for mapping actin network turnover in lamellipodia (10,12). We suggest that reevaluation of these studies is necessary for the possible artifact arising from convection-mediated misdistribution of actin probes. A similar problem might occur in live-cell imaging of phenomena accompanied by cytoplasmic flow such as in *C. elegans* zygotes, *Drosophila* oocytes, and plant cells. When observing cells with cytoplasmic flow, it is necessary to

pay attention to whether target-binding probes report actual localization.

Prompted by our finding of the discrepancy between F-actin and phalloidin distributions, we recently reexamined myosin regulation of actin stability (38). In the previous study (12), phalloidin was employed as an F-actin probe in quantitative fluorescent speckle microscopy in live fish keratocytes. The quantitative fluorescent speckle microscopy study reported that actin-myosin II contraction enhances actin network disassembly (12). However, rear-biased misdistribution of phalloidin may have hindered the accurate monitoring of actin network redistribution. We therefore employed fluorescent DyLight-dye-labeled actin that shows identical distribution to F-actin in lamellipodia. In combination with electroporation-based single-molecule speckle microscopy, which allows direct observation of actin turnover, we revealed that the myosin II inhibitor blebbistatin enhances actin disassembly in lamellipodia of fish keratocytes and lamella of *Xenopus* XTC cells at an early stage of the inhibition (38). Our data thus provide compelling evidence that actomyosin contraction stabilizes on actin filaments, contrary to the results of earlier studies (12,39–41).

## CONCLUSIONS

In this study, we show evidence of convection-induced misdistribution of actin probes by both experimental data and physical models. Our simulations suggest that a convection-dependent mechanism may strongly influence the distribution of actin-binding probes. Our finding warns about the potential error arising from the use of target-binding probes in quantitative live-cell imaging.

## SUPPORTING MATERIAL

Supporting Materials and Methods, four figures, and two tables are available at [http://www.biophysj.org/biophysj/supplemental/S0006-3495\(18\)31287-6](http://www.biophysj.org/biophysj/supplemental/S0006-3495(18)31287-6).

## AUTHOR CONTRIBUTIONS

S.Y., S.T., and T.K. performed experiments and analyzed data. S.Y., S.T., T.K., and N.W. designed experiments. D.T., D.V., and N.W. performed simulations. S.Y., D.T., and N.W. wrote the manuscript. All other authors edited the manuscript.

## ACKNOWLEDGMENTS

We thank Shu Yamamura for help with line scan analysis.

This work was supported by Japan Society for the Promotion of Science KAKENHI Grant Number JP15K07045 and JP18K06217 (S.Y.), by National Institutes of Health RO1GM114201 (D.V.), by Japan Science and Technology Agency-Core Research for Evolutional Science and Technology Grant Number JPMJCR15G5 (N.W.), and by the Uehara Memorial Foundation (N.W.).

## REFERENCES

- Gulyani, A., E. Vitriol, ..., K. M. Hahn. 2011. A biosensor generated via high-throughput screening quantifies cell edge Src dynamics. *Nat. Chem. Biol.* 7:437–444.
- Helma, J., K. Schmidthals, ..., H. Leonhardt. 2012. Direct and dynamic detection of HIV-1 in living cells. *PLoS One.* 7:e50026.
- Yamashita, S., T. Tsuboi, ..., T. Michiue. 2016. Wide and high resolution tension measurement using FRET in embryo. *Sci. Rep.* 6:28535.
- Melak, M., M. Plessner, and R. Grosse. 2017. Actin visualization at a glance. *J. Cell Sci.* 130:525–530.
- Riedl, J., A. H. Crevenna, ..., R. Wedlich-Soldner. 2008. Lifeact: a versatile marker to visualize F-actin. *Nat. Methods.* 5:605–607.
- Kiuchi, T., M. Higuchi, ..., N. Watanabe. 2015. Multitarget super-resolution microscopy with high-density labeling by exchangeable probes. *Nat. Methods.* 12:743–746.
- Small, J. V. 1995. Getting the actin filaments straight: nucleation-release or treadmilling? *Trends Cell Biol.* 5:52–55.
- Cramer, L. P. 1997. Molecular mechanism of actin-dependent retrograde flow in lamellipodia of motile cells. *Front. Biosci.* 2:d260–d270.
- Yamashiro, S., and N. Watanabe. 2014. A new link between the retrograde actin flow and focal adhesions. *J. Biochem.* 156:239–248.
- Schaub, S., S. Bohnet, ..., A. B. Verkhovskiy. 2007. Comparative maps of motion and assembly of filamentous actin and myosin II in migrating cells. *Mol. Biol. Cell.* 18:3723–3732.
- Vallotton, P., G. Danuser, ..., A. B. Verkhovskiy. 2005. Tracking retrograde flow in keratocytes: news from the front. *Mol. Biol. Cell.* 16:1223–1231.
- Wilson, C. A., M. A. Tsuchida, ..., J. A. Theriot. 2010. Myosin II contributes to cell-scale actin network treadmilling through network disassembly. *Nature.* 465:373–377.
- Watanabe, N., and T. J. Mitchison. 2002. Single-molecule speckle analysis of actin filament turnover in lamellipodia. *Science.* 295:1083–1086.
- Ryan, G. L., H. M. Petroccia, ..., D. Vavylonis. 2012. Excitable actin dynamics in lamellipodial protrusion and retraction. *Biophys. J.* 102:1493–1502.
- Yamashiro, S., H. Mizuno, ..., N. Watanabe. 2014. New single-molecule speckle microscopy reveals modification of the retrograde actin flow by focal adhesions at nanometer scales. *Mol. Biol. Cell.* 25:1010–1024.
- Shcherbakova, D. M., M. Baloban, ..., V. V. Verkhusha. 2016. Bright monomeric near-infrared fluorescent proteins as tags and biosensors for multiscale imaging. *Nat. Commun.* 7:12405.
- Watanabe, N. 2012. Fluorescence single-molecule imaging of actin turnover and regulatory mechanisms. *Methods Enzymol.* 505:219–232.
- Yamashiro, S., and N. Watanabe. 2017. An infrared actin probe for deep-cell electroporation-based single-molecule speckle (eSiMS) microscopy. *Sensors (Basel).* 17:E1545.
- Yamashiro, S., H. Mizuno, and N. Watanabe. 2015. An easy-to-use single-molecule speckle microscopy enabling nanometer-scale flow and wide-range lifetime measurement of cellular actin filaments. *Methods Cell Biol.* 125:43–59.
- Spudich, J. A., and S. Watt. 1971. The regulation of rabbit skeletal muscle contraction. I. Biochemical studies of the interaction of the tropomyosin-troponin complex with actin and the proteolytic fragments of myosin. *J. Biol. Chem.* 246:4866–4871.
- Svitkina, T. M., A. B. Verkhovskiy, ..., G. G. Borisy. 1997. Analysis of the actin-myosin II system in fish epidermal keratocytes: mechanism of cell body translocation. *J. Cell Biol.* 139:397–415.
- Theriot, J. A., and T. J. Mitchison. 1991. Actin microfilament dynamics in locomoting cells. *Nature.* 352:126–131.
- McGrath, J. L., Y. Tardy, ..., J. H. Hartwig. 1998. Simultaneous measurements of actin filament turnover, filament fraction, and monomer diffusion in endothelial cells. *Biophys. J.* 75:2070–2078.



24. De La Cruz, E. M., and T. D. Pollard. 1996. Kinetics and thermodynamics of phalloidin binding to actin filaments from three divergent species. *Biochemistry*. 35:14054–14061.
25. Courtemanche, N., T. D. Pollard, and Q. Chen. 2016. Avoiding artefacts when counting polymerized actin in live cells with LifeAct fused to fluorescent proteins. *Nat. Cell Biol.* 18:676–683.
26. Abraham, V. C., V. Krishnamurthi, ..., F. Lanni. 1999. The actin-based nanomachine at the leading edge of migrating cells. *Biophys. J.* 77:1721–1732.
27. Kiuchi, T., T. Nagai, ..., K. Mizuno. 2011. Measurements of spatiotemporal changes in G-actin concentration reveal its effect on stimulus-induced actin assembly and lamellipodium extension. *J. Cell Biol.* 193:365–380.
28. Burnette, D. T., A. W. Schaefer, ..., P. Forscher. 2007. Filopodial actin bundles are not necessary for microtubule advance into the peripheral domain of *Aplysia* neuronal growth cones. *Nat. Cell Biol.* 9:1360–1369.
29. Smith, M. B., T. Kiuchi, ..., D. Vavylonis. 2013. Distributed actin turnover in the lamellipodium and FRAP kinetics. *Biophys. J.* 104:247–257.
30. Miyoshi, T., T. Tsuji, ..., N. Watanabe. 2006. Actin turnover-dependent fast dissociation of capping protein in the dendritic nucleation actin network: evidence of frequent filament severing. *J. Cell Biol.* 175:947–955.
31. Raz-Ben Aroush, D., N. Ofer, ..., K. Keren. 2017. Actin turnover in lamellipodial fragments. *Curr. Biol.* 27:2963–2973.e14.
32. Nishida, E., K. Iida, ..., H. Sakai. 1987. Cofilin is a component of intranuclear and cytoplasmic actin rods induced in cultured cells. *Proc. Natl. Acad. Sci. USA.* 84:5262–5266.
33. Svitkina, T. M., and G. G. Borisy. 1999. Arp2/3 complex and actin depolymerizing factor/cofilin in dendritic organization and treadmilling of actin filament array in lamellipodia. *J. Cell Biol.* 145:1009–1026.
34. Tsuji, T., T. Miyoshi, ..., N. Watanabe. 2009. An order of magnitude faster AIP1-associated actin disruption than nucleation by the Arp2/3 complex in lamellipodia. *PLoS One.* 4:e4921.
35. Belin, B. J., L. M. Goins, and R. D. Mullins. 2014. Comparative analysis of tools for live cell imaging of actin network architecture. *Bioarchitecture.* 4:189–202.
36. Maiuri, P., J. F. Rupprecht, ..., R. Voituriez. 2015. Actin flows mediate a universal coupling between cell speed and cell persistence. *Cell.* 161:374–386.
37. Lee, C. W., E. A. Vitriol, ..., J. Q. Zheng. 2013. Dynamic localization of G-actin during membrane protrusion in neuronal motility. *Curr. Biol.* 23:1046–1056.
38. Yamashiro, S., S. Tanaka, ..., N. Watanabe. 2018. Myosin-dependent actin stabilization as revealed by single-molecule imaging of actin turnover. *Mol. Biol. Cell.* 29:1941–1947.
39. Guha, M., M. Zhou, and Y. L. Wang. 2005. Cortical actin turnover during cytokinesis requires myosin II. *Curr. Biol.* 15:732–736.
40. Murthy, K., and P. Wadsworth. 2005. Myosin-II-dependent localization and dynamics of F-actin during cytokinesis. *Curr. Biol.* 15:724–731.
41. Haviv, L., D. Gillo, ..., A. Bernheim-Groswasser. 2008. A cytoskeletal demolition worker: myosin II acts as an actin depolymerization agent. *J. Mol. Biol.* 375:325–330.

**Biophysical Journal, Volume 116**

**Supplemental Information**

**Convection-Induced Biased Distribution of Actin Probes in Live Cells**

**Sawako Yamashiro, Daisuke Taniguchi, Soichiro Tanaka, Tai Kiuchi, Dimitrios Vavylonis, and Naoki Watanabe**

**Supplementary Table S1****Model parameters**

| Symbol           | Description                                | Value                                                 |
|------------------|--------------------------------------------|-------------------------------------------------------|
|                  | Retrograde flow speed relative to cell     |                                                       |
|                  | migration speed                            |                                                       |
| $v$              | XTC cell                                   | 60 nm s <sup>-1</sup>                                 |
|                  | keratocyte                                 | 100 nm s <sup>-1</sup>                                |
|                  | Diffusion coefficient of free actin probe  |                                                       |
| $D$              | Lifeact-mCherry                            | 6.8 μm <sup>2</sup> s <sup>-1</sup>                   |
|                  | Alexa647-phalloidin                        | 16.7 μm <sup>2</sup> s <sup>-1</sup>                  |
|                  | Probe association rate                     |                                                       |
| $k_{\text{on}}$  | Lifeact-mCherry                            | 2.28 μM <sup>-1</sup> s <sup>-1</sup>                 |
|                  | Alexa647-phalloidin                        | 2.9×10 <sup>-2</sup> μM <sup>-1</sup> s <sup>-1</sup> |
|                  | Probe dissociation rate                    |                                                       |
| $k_{\text{off}}$ | Lifeact-mCherry                            | 30.1 s <sup>-1</sup>                                  |
|                  | Alexa647-phalloidin                        | 0.08 s <sup>-1</sup>                                  |
| $\bar{F}$        | Uniform F-actin concentration              | 1000 μM                                               |
| $a$              | Slope of non-uniform F-actin concentration | 112.5 μM μm <sup>-1</sup>                             |
| $b$              | Base of non-uniform F-actin concentration  | 100 μM                                                |
| $L$              | Lamellipodium length                       | 8 μm                                                  |

## A Cell 1

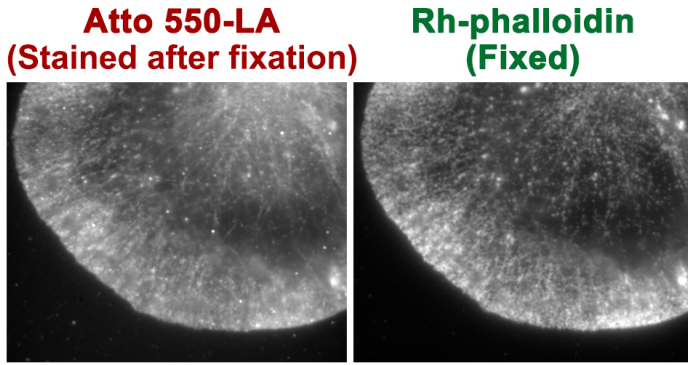

## B Cell 1

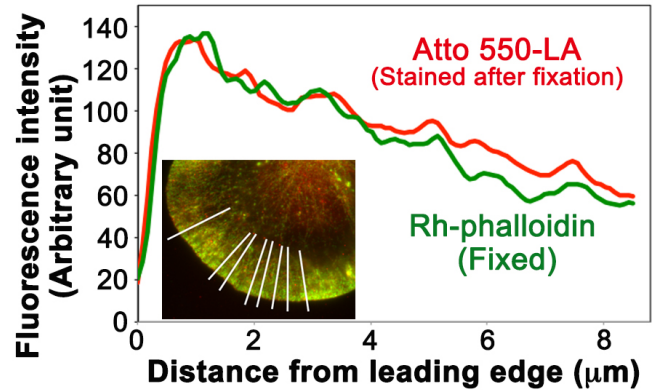

## C Cell 2

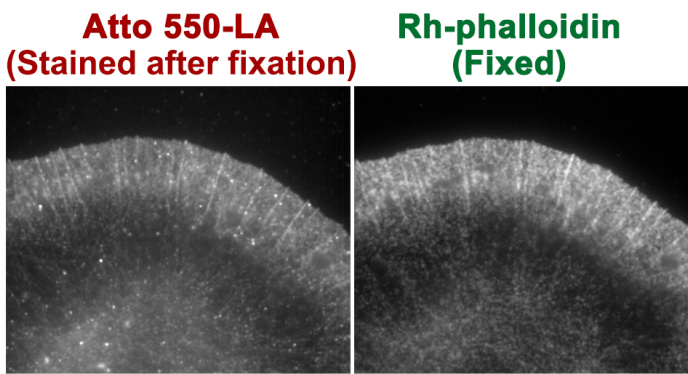

## D Cell 2

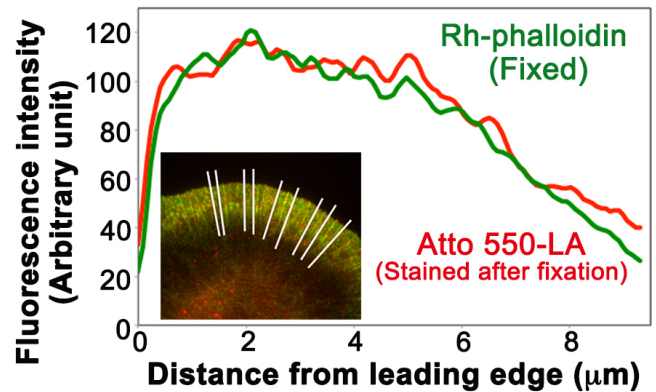

## Suppl. Fig. S1

**Figure S1.** Two other examples of the experiments in Fig. 1 *D* and *E*. The data show similar distribution of Atto 550-Lifeact (Atto 550-LA) and rhodamine-phalloidin (Rh-phalloidin) in fixed XTC cells.

(*A*, and *C*) Images of fixed cells stained with Atto 550-LA (left) and Rh-phalloidin (right). Bars = 5  $\mu\text{m}$ .

(*B*, and *D*) Average fluorescence intensity of the images in *A* or *C* along the white lines in the insets.

## A Cell 1

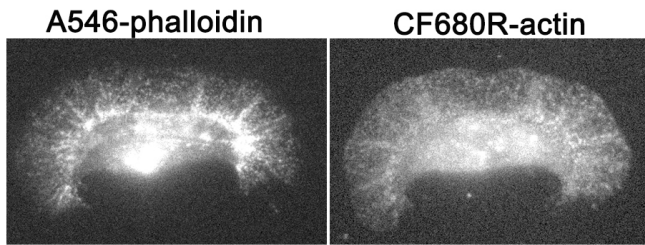

## B Cell 1

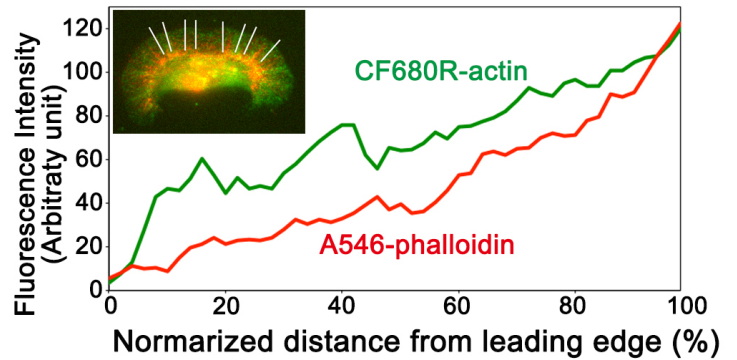

## C Cell 2

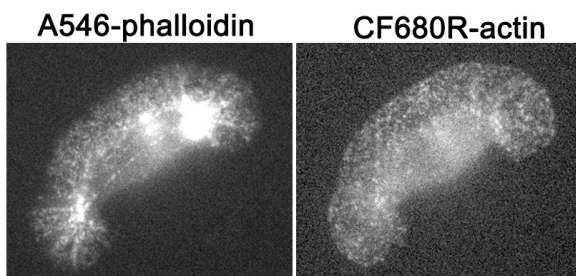

## D Cell 2

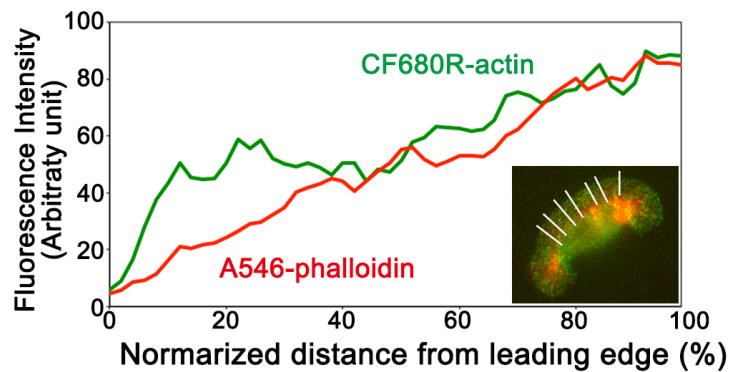

## Suppl. Fig. S2

**Figure S2.** Two other examples of the experiments in Fig. 2. (**A, and C**) Fluorescent speckle images of Alexa546-phalloidin (A546-phalloidin, left) and CF680R-actin (right) in live fish keratocytes. Bars = 10  $\mu\text{m}$ . (**B, and D**) Average fluorescence intensity of the images in *A* or *C* along the white lines in the insets.

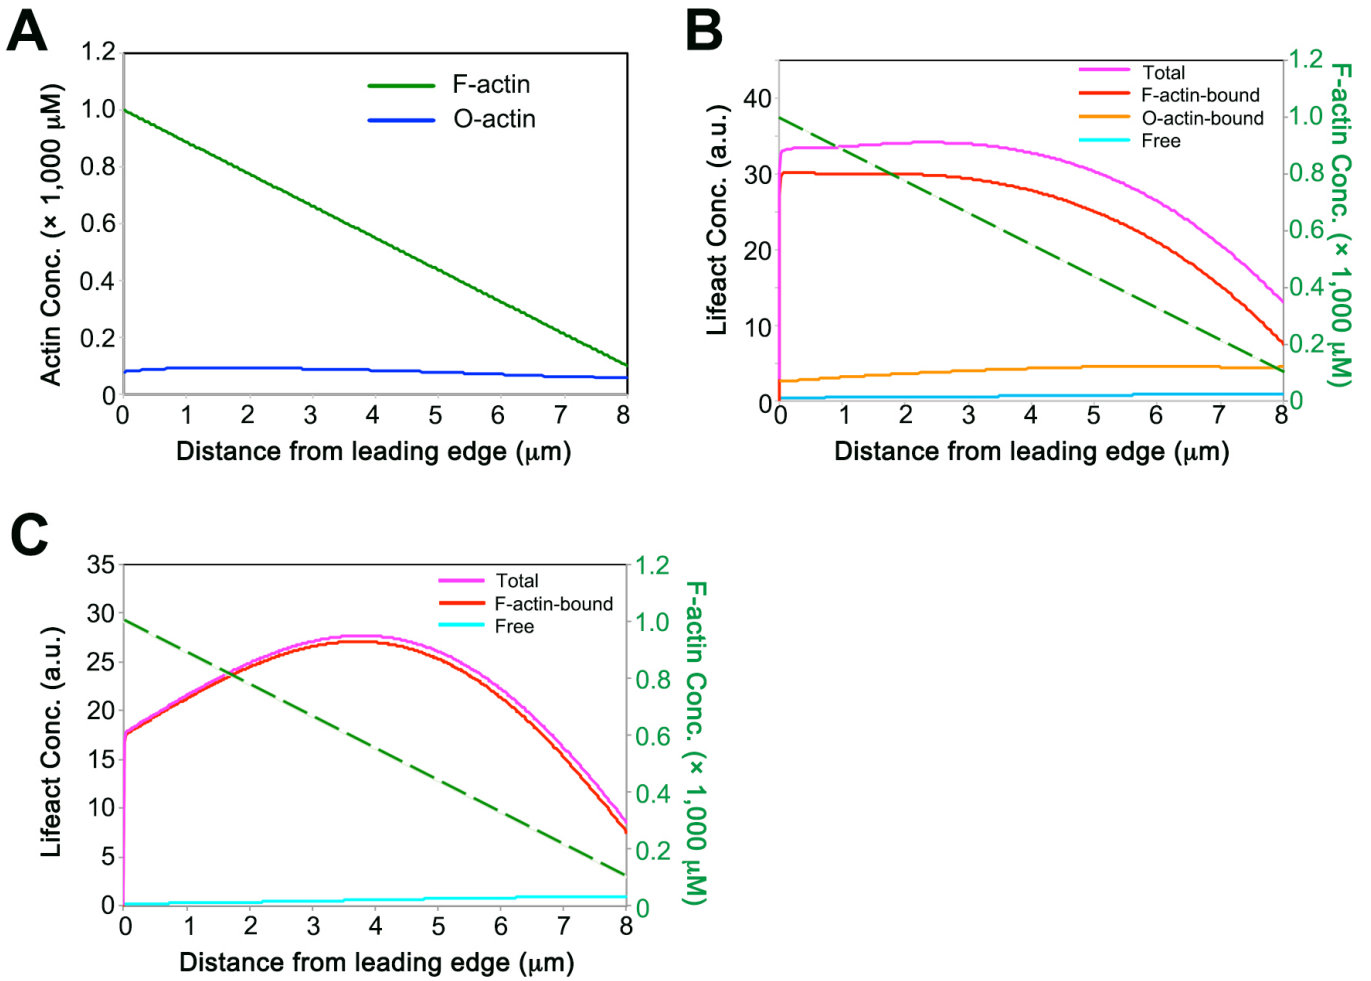

## Suppl. Fig. S3

**Figure S3.** Simulated concentration profile of Lifect-mCherry in a model with both F-actin and actin oligomers (O-actin) as Lifect-binding species. **(A)** Concentration profiles of F- and O-actin in lamellipodia. The ratio of O-actin to F-actin is set as  $\sim 0.1$  at leading edge (29). **(B)** Calculated distributions of Lifect-mCherry in the states of F-actin-bound (red), O-actin-bound (orange) and free (light blue). The distribution of total Lifect-mCherry is indicated by the pink line. A model lamellipodium with a linear decrease in F-actin concentration is indicated in a green dotted line. The supplementary method of simulation including oligomer actin is described below. **(C)** Calculated distribution of Lifect-mCherry in a model with F-actin as only Lifect-binding species. The method and the model parameters for simulation is same to that used in Fig. 3 C, except for the retrograde flow speed was set as  $30 \text{ nm/s}$ .

[Supplementary method of simulation including oligomer actin employed in Fig. S3B]

## 1 Model equations

The modified model to take into account the effect of oligomer actin is as follows

$$\frac{\partial C_f}{\partial t} = D_f \frac{\partial^2 C_f}{\partial x^2} + k_{\text{off}} C_{\text{fb}} - k_{\text{on}} F C_f + k_- C_{\text{ob}} - k_+ O C_f + k_d C_{\text{ob}} \quad (1)$$

$$\frac{\partial C_{\text{fb}}}{\partial t} = v \frac{\partial C_{\text{fb}}}{\partial x} - k_{\text{off}} C_{\text{fb}} + k_{\text{on}} F C_f - k_s C_{\text{fb}} + k_i F C_{\text{ob}} \quad (2)$$

$$\frac{\partial C_{\text{ob}}}{\partial t} = D_o \frac{\partial^2 C_{\text{ob}}}{\partial x^2} + k_s C_{\text{fb}} - k_i F C_{\text{ob}} - k_- C_{\text{ob}} + k_+ O C_f - k_d C_{\text{ob}} \quad (3)$$

$$\frac{\partial O}{\partial t} = D_o \frac{\partial^2 O}{\partial x^2} + k_s F - k_i F O - k_d O \quad (4)$$

where  $C_f$ ,  $C_{\text{fb}}$ , and  $C_{\text{ob}}$  are respectively the concentration of free, F-actin-bound, oligomer actin-bound probes.  $F$  and  $O$  represent the concentration of F-actin and oligomer actin at 1-dimensional position  $x$  at time  $t$ , respectively.  $x$  ranges from 0 (lamellipodial base) from  $L$  (leading edge). Based on our experimental data of  $F(x)$  in XTC cells, we assumed that the concentration profile of actin,  $F(x)$ , is prescribed as  $F(x) = ax + b$ . The model parameters are summarized in Supplementary Table S2.

### Supplementary Table S2: Model parameters for Fig. S3B

| Symbol           | Meaning                                                      | Value                                 |
|------------------|--------------------------------------------------------------|---------------------------------------|
| $v$              | Retrograde flow speed                                        | 30 nm s <sup>-1</sup>                 |
| $D_f$            | Diffusion coefficient of free Lifeact                        | 6.8 μm <sup>2</sup> s <sup>-1</sup>   |
| $D_o$            | Diffusion coefficient of oligomer actin                      | 1.0 μm <sup>2</sup> s <sup>-1</sup>   |
| $k_{\text{on}}$  | Rate at which free Lifeact associates with F-actin           | 2.28 μM <sup>-1</sup> s <sup>-1</sup> |
| $k_{\text{off}}$ | Rate at which F-actin-bound Lifeact dissociates from F-actin | 30.1 s <sup>-1</sup>                  |
| $k_+$            | Rate at which free Lifeact associates with O-actin           | 2.28 μM <sup>-1</sup> s <sup>-1</sup> |

|       |                                                              |                                                 |
|-------|--------------------------------------------------------------|-------------------------------------------------|
| $k_-$ | Rate at which O-actin-bound Lifeact dissociates from O-actin | $30.1 \text{ s}^{-1}$                           |
| $k_s$ | F-actin severing rate                                        | $0.25 \text{ s}^{-1}$                           |
| $k_i$ | Rate at which O-actin is incorporated into F-actin           | $0.002 \text{ }\mu\text{M}^{-1} \text{ s}^{-1}$ |
| $k_d$ | Disassembly rate of O-actin                                  | $0.5 \text{ s}^{-1}$                            |
| $a$   | Slope of linear F-actin concentration profile                | $112.5 \text{ }\mu\text{M } \mu\text{m}^{-1}$   |
| $b$   | Base of linear F-actin concentration profile                 | $100 \text{ }\mu\text{M}$                       |
| $L$   | Lamellipodial length                                         | $8 \text{ }\mu\text{m}$                         |

The boundary conditions at the steady state are

$$C_f(0) = \text{const.}, \frac{\partial C_f(L)}{\partial x} = 0 \quad (5)$$

$$vC_{fb}(L) = 0 \quad (6)$$

$$D_o \frac{\partial C_{ob}(0)}{\partial x} = -vC_{fb}(0), D_o \frac{\partial C_{ob}(L)}{\partial x} = -vC_{fb}(L) \quad (7)$$

$$D_o \frac{\partial O(0)}{\partial x} = -vF(0), D_o \frac{\partial O(L)}{\partial x} = -vF(L) \quad (8)$$

In Eq. (5), const. is determined by the total amount of the probe.

## 2 Spatial discretization

Using the standard finite difference scheme, Eqs. (1)-(4) with the boundary conditions Eqs. (5)-(8) in the steady-state are discretized in space with a step  $\Delta x$  as



$$0 = D_f \frac{C_f(x_{i+1}) - 2C_f(x_i) + C_f(x_{i-1}))}{\Delta x^2} + k_{\text{off}}C_{\text{fb}}(x_i) - k_{\text{on}}F(x_i)C_f(x_i) + k_-C_{\text{ob}}(x_i) - k_+O(x_i)C_f(x_i) + k_dC_{\text{ob}}(x_i) \quad (2 \leq i \leq n-1) \quad (9)$$

$$C_f(x_1) = \text{const.} \quad (10)$$

$$C_f(x_n) = C_f(x_{n-1}) \quad (11)$$

$$0 = v \frac{C_{\text{fb}}(x_{i+1}) - C_{\text{fb}}(x_i)}{\Delta x} - k_{\text{off}}C_{\text{fb}}(x_i) + k_{\text{on}}F(x_i)C_f(x_i) - k_sC_{\text{fb}}(x_i) + k_iF(x_i)C_{\text{ob}}(x_i) \quad (1 \leq i \leq n-1) \quad (12)$$

$$C_{\text{fb}}(x_n) = 0 \quad (13)$$

$$0 = D_o \frac{C_{\text{ob}}(x_{i+1}) - 2C_{\text{ob}}(x_i) + C_{\text{ob}}(x_{i-1}))}{\Delta x^2} + k_sC_{\text{fb}}(x_i) - k_iF(x_i)C_{\text{ob}}(x_i) - k_-C_{\text{ob}}(x_i) + k_+O(x_i)C_f(x_i) - k_dC_{\text{ob}}(x_i) \quad (2 \leq i \leq n-1) \quad (14)$$

$$C_{\text{ob}}(x_1) = C_{\text{ob}}(x_2) + \frac{v\Delta x}{D_o}C_{\text{fb}}(x_1) \quad (15)$$

$$C_{\text{ob}}(x_n) = C_{\text{ob}}(x_{n-1}) - \frac{v\Delta x}{D_o}C_{\text{fb}}(x_n) \quad (16)$$

$$0 = D_o \frac{O(x_{i+1}) - 2O(x_i) + O(x_{i-1}))}{\Delta x^2} + k_sF(x_i) - k_iF(x_i)O(x_i) - k_dO(x_i) \quad (2 \leq i \leq n-1) \quad (17)$$

$$O(x_1) = O(x_2) + \frac{v\Delta x}{D_o}F(x_1) \quad (18)$$

$$O(x_n) = O(x_{n-1}) - \frac{v\Delta x}{D_o}F(x_n) \quad (19)$$

where  $x_i = (i-1)\Delta x$  ( $i = 1, \dots, n$ ) and  $(n-1)\Delta x = L$ . In the present study, we set  $\Delta x = 0.01$  [ $\mu\text{m}$ ].

Rearranging Eqs. (9)-(19) gives

$$C_f(x_i) = \frac{C_f(x_{i+1}) + C_f(x_{i-1}) + c_3C_{\text{fb}}(x_i) + c_4C_{\text{ob}}(x_i)}{c_1F(x_i) + c_2O(x_i) + 2} \quad (2 \leq i \leq n-1) \quad (20)$$

$$C_f(x_1) = \text{const.} \quad (21)$$

$$C_f(x_n) = C_f(x_{n-1}) \quad (22)$$

$$C_{\text{fb}}(x_i) = \frac{1}{c_5} [C_{\text{fb}}(x_{i+1}) + c_6F(x_i)C_f(x_i) + c_7F(x_i)C_{\text{ob}}(x_i)] \quad (1 \leq i \leq n-1) \quad (23)$$

$$C_{\text{fb}}(x_n) = 0 \quad (24)$$

$$C_{\text{ob}}(x_i) = \frac{C_{\text{ob}}(x_{i+1}) + C_{\text{ob}}(x_{i-1}) + c_{10}C_{\text{fb}}(x_i) + c_{11}O(x_i)C_f(x_i)}{c_8F(x_i) + c_9} \quad (2 \leq i \leq n-1) \quad (25)$$

$$C_{\text{ob}}(x_1) = C_{\text{ob}}(x_2) + c_{13}C_{\text{fb}}(x_1) \quad (26)$$

$$C_{\text{ob}}(x_n) = C_{\text{ob}}(x_{n-1}) \quad (27)$$

$$O(x_i) = \frac{O(x_{i+1}) + O(x_{i-1}) + c_{10}F(x_i)}{c_8F(x_i) + c_{12}} \quad (2 \leq i \leq n-1) \quad (28)$$

$$O(x_1) = O(x_2) + c_{13}F(x_1) \quad (29)$$

$$O(x_n) = O(x_{n-1}) - c_{13}F(x_n) \quad (30)$$

where

$$c_1 = \frac{k_{\text{on}}\Delta x^2}{D_f}, c_2 = \frac{k_+\Delta x^2}{D_f}, c_3 = \frac{k_{\text{off}}\Delta x^2}{D_f}, c_4 = \frac{(k_- + k_d)\Delta x^2}{D_f}, c_5 = 1 + \frac{(k_{\text{off}} + k_s)\Delta x}{v} \quad (31)$$

$$c_6 = \frac{k_{\text{on}}\Delta x}{v}, c_7 = \frac{k_i\Delta x}{v}, c_8 = \frac{k_i\Delta x^2}{D_o}, c_9 = 2 + \frac{(k_- + k_d)\Delta x^2}{D_o}, c_{10} = \frac{k_s\Delta x^2}{D_o} \quad (32)$$

$$c_{11} = \frac{k_+\Delta x^2}{D_o}, c_{12} = 2 + \frac{k_d\Delta x^2}{D_o}, c_{13} = \frac{v\Delta x}{D_o} \quad (33)$$

Notice that Eqs. (20)-(30) remain unsolved with respect to  $C_f(x_i), C_{fb}(x_i), C_{ob}(x_i)$  and  $O(x_i)$  because the RHS of Eqs. (20)-(30) also include unknown  $C_f(x_{i+1}), C_f(x_{i-1}), C_{fb}(x_{i+1}), C_{ob}(x_{i+1}), C_{ob}(x_{i-1}), O(x_{i-1})$  and  $O(x_{i-1})$ .

### 3 Iterative method to obtain the steady-state solution

To fully solve Eqs. (20)-(30), we used the following iterative update of  $C_f(x_i), C_{fb}(x_i), C_{ob}(x_i)$ , and  $O(x_i)$ :

$$C_f^{[k+1]}(x_i) \leftarrow \frac{C_f^{[k]}(x_{i+1}) + C_f^{[k]}(x_{i-1}) + c_3 C_{fb}^{[k]}(x_i) + c_4 C_{ob}^{[k]}(x_i)}{c_1 F(x_i) + c_2 O^{[k]}(x_i) + 2} \quad (2 \leq i \leq n-1) \quad (34)$$

$$C_f^{[k+1]}(x_n) \leftarrow C_f^{[k+1]}(x_{n-1}) \quad (35)$$

$$C_{fb}^{[k+1]}(x_i) \leftarrow \frac{1}{c_5} \left[ C_{fb}^{[k]}(x_{i+1}) + c_6 F(x_i) C_f^{[k]}(x_i) + c_7 F(x_i) C_{ob}^{[k]}(x_i) \right] \quad (1 \leq i \leq n-1) \quad (36)$$

$$C_{ob}^{[k+1]}(x_i) \leftarrow \frac{C_{ob}^{[k]}(x_{i+1}) + C_{ob}^{[k]}(x_{i-1}) + c_{10} C_{fb}^{[k]}(x_i) + c_{11} O^{[k]}(x_i) C_f^{[k]}(x_i)}{c_8 F(x_i) + c_9} \quad (2 \leq i \leq n-1) \quad (37)$$

$$C_{ob}^{[k+1]}(x_1) \leftarrow C_{ob}^{[k+1]}(x_2) + c_{13} C_{fb}^{[k+1]}(x_1) \quad (38)$$

$$C_{ob}^{[k+1]}(x_n) \leftarrow C_{ob}^{[k+1]}(x_{n-1}) \quad (39)$$

$$O^{[k+1]}(x_i) \leftarrow \frac{O^{[k]}(x_{i+1}) + O^{[k]}(x_{i-1}) + c_{10} F(x_i)}{c_8 F(x_i) + c_{12}} \quad (2 \leq i \leq n-1) \quad (40)$$

$$O^{[k+1]}(x_1) \leftarrow O^{[k+1]}(x_2) + c_{13} F(x_1) \quad (41)$$

$$O^{[k+1]}(x_n) \leftarrow O^{[k+1]}(x_{n-1}) - c_{13} F(x_n) \quad (42)$$

where the superscript  $[k]$  indicates the number of iteration steps. It is clear that one can obtain the steady-state solution of Eqs. (1)-(4) after the convergence of the loop with respect to  $k$ . During the iterations, we kept  $C_f(x_1)$  constant, namely, 1, and also maintained  $C_{fb}(x_n) = 0$ . We set the initial guess of  $C_f, C_{fb}, C_{ob}$ , and  $O$  as  $C_f(x_1) = 1, C_f(x_{2 \sim n}) = 0, C_{fb}(x_{1 \sim n}) = 0, O(x_1) = O(x_2) + c_{13} F(x_1), O(x_{2 \sim n-1}) = k_s F(x_{2 \sim n-1}) / [k_i F(x_{2 \sim n-1}) + k_d]$ , and  $O(x_n) = O(x_{n-1}) - c_{13} F(x_n)$ . We judged convergence of the loop if all of the following conditions are satisfied:  $\| C_f^{[k+1]} - C_f^{[k]} \|^2 \leq \epsilon, \|$

$C_{fb}^{[k+1]} - C_{fb}^{[k]} \|^2 \leq \epsilon, \| C_{ob}^{[k+1]} - C_{ob}^{[k]} \|^2 \leq \epsilon$  and  $\| O^{[k+1]} - O^{[k]} \|^2 \leq \epsilon$  ( $\epsilon = 10^{-10}$ ). After the convergence, we normalized  $C_f, C_{fb}$  and  $C_{ob}$  such that they satisfy  $\int_0^L (C_f + C_{fb} + C_{ob}) dx = C_{tot}$  where  $C_{tot}$  is the total amount of actin probes in lamellipodia. In the present study, we set  $C_{tot} = 1$ .

Instead of Eq. (12) where the forward finite difference scheme was used, one might use the central finite difference scheme to replace Eq. (36) with

$$C_{fb}^{[k+1]}(x_i) \leftarrow \frac{1}{c_5 - 1} \left[ C_{fb}^{[k]}(x_{i+1}) - C_{fb}^{[k]}(x_{i-1}) + c_6 F(x_i) C_f^{[k]}(x_i) + c_7 F(x_i) C_{ob}^{[k]}(x_i) \right] \quad (43)$$

However, we found that iterative updating using Eq.(43) was unstable because the RHS of Eq (43) can sometimes become negative due to  $-C_{fb}^{[k]}(x_{i-1})$  depending on model parameters and shape of  $C_{fb}(x_i)$ . To ensure positivity of  $C_{fb}$  during all updating steps, we used the forward difference scheme.

## A Appendix: analytical solution

In the special case where  $k_i = 0$  is satisfied, the analytical solution of  $O$  can be obtained. we used the analytical solution to check the validity of the iterative method. The steady-state model equation about O-actin and its BCs are

$$\frac{\partial^2 O}{\partial x^2} + k_s F - k_i FO - k_d O = 0 \quad (44)$$

$$D_o \frac{\partial O(0)}{\partial x} = -vF(0), D_o \frac{\partial O(L)}{\partial x} = -vF(L), F(x) = ax + b \quad (45)$$

The solution of which is given by

$$O(x) = \frac{k_s}{k_d}(ax + b) + C_1 \exp\left(-\frac{x}{\lambda}\right) + C_2 \exp\left(\frac{x}{\lambda}\right) \quad (46)$$

$$C_1 = \frac{\lambda}{\exp\left(-\frac{2L}{\lambda}\right) - 1} \left\{ \left( \frac{ak_s}{k_d} + \frac{bv}{D_o} \right) \left[ \exp\left(-\frac{L}{\lambda}\right) - 1 \right] + \frac{avL}{D_o} \exp\left(-\frac{L}{\lambda}\right) \right\} \quad (47)$$

$$C_2 = C_1 - \frac{ak_s\lambda}{k_d} - \frac{bv\lambda}{D_o} \quad (48)$$

where  $\lambda = \sqrt{D_o/k_d}$ .

Supplementary Figure S4 compares the numerical solution and analytical solution at  $D_o = 0.25$  [ $\mu\text{m}^2\text{s}^{-1}$ ]. The numerical solution agrees well with the analytical one.

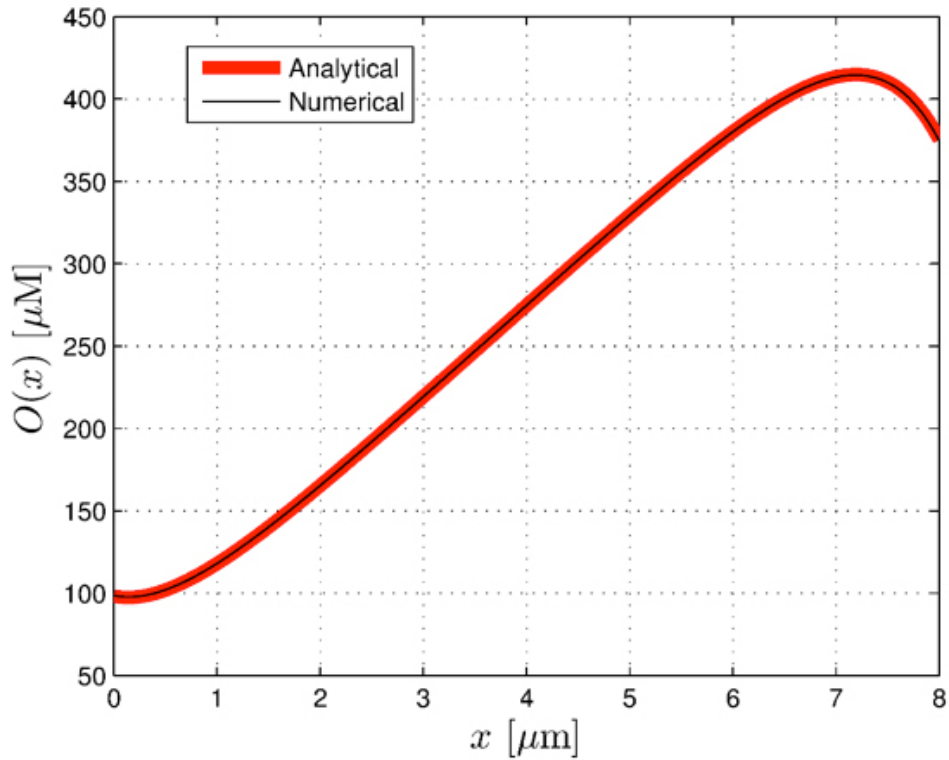

**Suppl. Fig. S4**

**Figure S4** Comparison between analytical and numerical solutions.  $D_o = 0.25$  [ $\mu\text{m}^2\text{s}^{-1}$ ] and  $k_i = 0$  [ $\mu\text{M}^{-1}\text{s}^{-1}$ ].
